# Supplementary material
Source: HighWire-hosted journal article supplement (http://thorax.bmjjournals.com/highwire/filestream/174159/field_highwire_adjunct_files/3/644345webonlyapp4.pdf)
Supplement: 644345webonlyapp4.pdf [file 644345webonlyapp4.pdf]

Supplementary Table 3a: Principal Phenotype

| BLOCK | CLADE | Cases | freq | Controls | freq | chi <sup>2</sup> | P     | OR (95 CI)       |
|-------|-------|-------|------|----------|------|------------------|-------|------------------|
| 1     | 1     | 251   | 0.30 | 371      | 0.32 | 0.68             | 0.409 | 0.92 (0.77-1.11) |
|       | 2     | 361   | 0.44 | 473      | 0.41 | 1.23             | 0.267 | 1.11 (0.93-1.33) |
|       | 3     | 142   | 0.17 | 187      | 0.16 | 0.24             | 0.622 | 1.07 (0.84-1.36) |
| 2     | 1     | 80    | 0.10 | 97       | 0.08 | 0.78             | 0.376 | 1.17 (0.85-1.59) |
|       | 2     | 92    | 0.11 | 147      | 0.13 | 1.06             | 0.303 | 0.86 (0.65-1.13) |
|       | 3     | 109   | 0.13 | 170      | 0.15 | 0.86             | 0.354 | 0.88 (0.68-1.14) |
|       | 4     | 367   | 0.45 | 485      | 0.42 | 0.94             | 0.334 | 1.1 (0.92-1.31)  |
|       | 5     | 85    | 0.10 | 109      | 0.09 | 0.28             | 0.598 | 1.1 (0.81-1.48)  |
| 3     | 1     | 145   | 0.18 | 148      | 0.13 | 8.03             | 0.005 | 1.44 (1.12-1.85) |
|       | 2     | 309   | 0.38 | 438      | 0.38 | 0.06             | 0.804 | 0.97 (0.81-1.17) |
|       | 3     | 225   | 0.27 | 355      | 0.31 | 2.85             | 0.091 | 0.84 (0.69-1.02) |
|       | 4     | 64    | 0.08 | 90       | 0.08 | 0.00             | 0.979 | 0.99 (0.71-1.38) |
| 4     | 1     | 131   | 0.16 | 167      | 0.15 | 0.58             | 0.446 | 1.11 (0.87-1.42) |
|       | 2     | 430   | 0.52 | 602      | 0.52 | 0.00             | 0.947 | 0.99 (0.83-1.18) |
|       | 3     | 220   | 0.27 | 305      | 0.27 | 0.00             | 0.989 | 1.01 (0.82-1.23) |
| 5     | 1     | 219   | 0.27 | 263      | 0.23 | 3.30             | 0.069 | 1.22 (0.99-1.5)  |
|       | 2     | 393   | 0.48 | 568      | 0.49 | 0.54             | 0.462 | 0.93 (0.78-1.11) |
|       | 3     | 30    | 0.04 | 35       | 0.03 | 0.36             | 0.550 | 1.2 (0.73-1.97)  |
|       | 4     | 30    | 0.04 | 63       | 0.05 | 3.24             | 0.072 | 0.65 (0.42-1.01) |
|       | 5     | 76    | 0.09 | 108      | 0.09 | 0.00             | 0.952 | 0.98 (0.72-1.33) |
| 6     | 1     | 539   | 0.65 | 743      | 0.65 | 0.07             | 0.787 | 1.03 (0.85-1.24) |
|       | 2     | 83    | 0.10 | 144      | 0.13 | 2.64             | 0.104 | 0.78 (0.59-1.04) |
|       | 3     | 83    | 0.10 | 96       | 0.08 | 1.50             | 0.221 | 1.23 (0.9-1.67)  |
|       | 4     | 50    | 0.06 | 66       | 0.06 | 0.04             | 0.842 | 1.06 (0.73-1.55) |
| 7     | 1     | 595   | 0.72 | 880      | 0.77 | 4.80             | 0.028 | 0.79 (0.64-0.97) |
|       | 2     | 103   | 0.13 | 131      | 0.11 | 0.44             | 0.505 | 1.11 (0.84-1.46) |
|       | 3     | 97    | 0.12 | 95       | 0.08 | 6.28             | 0.012 | 1.48 (1.1-1.99)  |

Supplementary Table 3b: Refined Phenotype

| BLOCK | CLADE | Cases | freq | Controls | freq | chi <sup>2</sup> | P     | OR (95 CI)       |
|-------|-------|-------|------|----------|------|------------------|-------|------------------|
| 1     | 1     | 131   | 0.30 | 371      | 0.33 | 1.15             | 0.283 | 0.87 (0.69-1.11) |
|       | 2     | 193   | 0.44 | 473      | 0.41 | 1.17             | 0.279 | 1.14 (0.91-1.42) |
|       | 3     | 77    | 0.18 | 187      | 0.16 | 0.36             | 0.550 | 1.11 (0.83-1.48) |
| 2     | 1     | 37    | 0.09 | 97       | 0.08 | 0.00             | 0.948 | 1.01 (0.68-1.5)  |
|       | 2     | 54    | 0.12 | 147      | 0.13 | 0.02             | 0.901 | 0.97 (0.69-1.35) |
|       | 3     | 58    | 0.13 | 170      | 0.15 | 0.44             | 0.505 | 0.89 (0.64-1.22) |
|       | 4     | 194   | 0.45 | 485      | 0.42 | 0.62             | 0.432 | 1.1 (0.88-1.37)  |
|       | 5     | 45    | 0.10 | 109      | 0.09 | 0.17             | 0.679 | 1.1 (0.76-1.59)  |
| 3     | 1     | 71    | 0.16 | 148      | 0.13 | 2.83             | 0.092 | 1.32 (0.97-1.79) |
|       | 2     | 168   | 0.39 | 438      | 0.38 | 0.01             | 0.910 | 1.02 (0.81-1.28) |
|       | 3     | 116   | 0.27 | 355      | 0.31 | 2.53             | 0.111 | 0.81 (0.63-1.04) |
|       | 4     | 37    | 0.09 | 90       | 0.08 | 0.11             | 0.740 | 1.09 (0.73-1.63) |
| 4     | 1     | 74    | 0.17 | 167      | 0.15 | 1.30             | 0.254 | 1.2 (0.89-1.62)  |
|       | 2     | 219   | 0.50 | 602      | 0.52 | 0.47             | 0.491 | 0.92 (0.74-1.15) |
|       | 3     | 123   | 0.28 | 305      | 0.27 | 0.38             | 0.536 | 1.09 (0.85-1.38) |
| 5     | 1     | 115   | 0.26 | 263      | 0.23 | 1.97             | 0.160 | 1.21 (0.93-1.56) |
|       | 2     | 211   | 0.49 | 568      | 0.49 | 0.08             | 0.773 | 0.96 (0.77-1.2)  |
|       | 3     | 14    | 0.03 | 35       | 0.03 | 0.00             | 0.991 | 1.06 (0.56-1.99) |
|       | 4     | 13    | 0.03 | 55       | 0.05 | 2.07             | 0.150 | 0.61 (0.33-1.13) |
|       | 5     | 34    | 0.08 | 108      | 0.09 | 0.89             | 0.346 | 0.81 (0.54-1.21) |
| 6     | 1     | 291   | 0.67 | 742      | 0.65 | 0.62             | 0.433 | 1.11 (0.88-1.4)  |
|       | 2     | 38    | 0.09 | 144      | 0.13 | 4.13             | 0.042 | 0.67 (0.46-0.97) |
|       | 3     | 43    | 0.10 | 96       | 0.08 | 0.83             | 0.361 | 1.22 (0.83-1.78) |
|       | 4     | 24    | 0.06 | 66       | 0.06 | 0.00             | 0.955 | 0.96 (0.59-1.55) |
| 7     | 1     | 306   | 0.70 | 880      | 0.77 | 6.35             | 0.012 | 0.72 (0.56-0.92) |
|       | 2     | 53    | 0.12 | 131      | 0.11 | 0.12             | 0.734 | 1.08 (0.77-1.51) |
|       | 3     | 75    | 0.17 | 132      | 0.11 | 8.66             | 0.003 | 1.61 (1.17-2.18) |
